# Supplementary material
Source: HighWire-hosted journal article supplement (http://dmd.aspetjournals.org/highwire/filestream/66297/field_highwire_adjunct_files/0/Supplemental_Figure_1_53611.pdf)
Supplement: Supplemental_Figure_1_53611.pdf [file Supplemental_Figure_1_53611.pdf]

### Supplemental Figure 1

Relationship between CYP1A2 Localization and Lipid Microdomain Formation as a Function of Lipid Composition

Lauren Brignac-Huber, James R. Reed, Marilyn K. Eyer, and Wayne L. Backes

Drug Metabolism and Disposition DMD/2013/053611

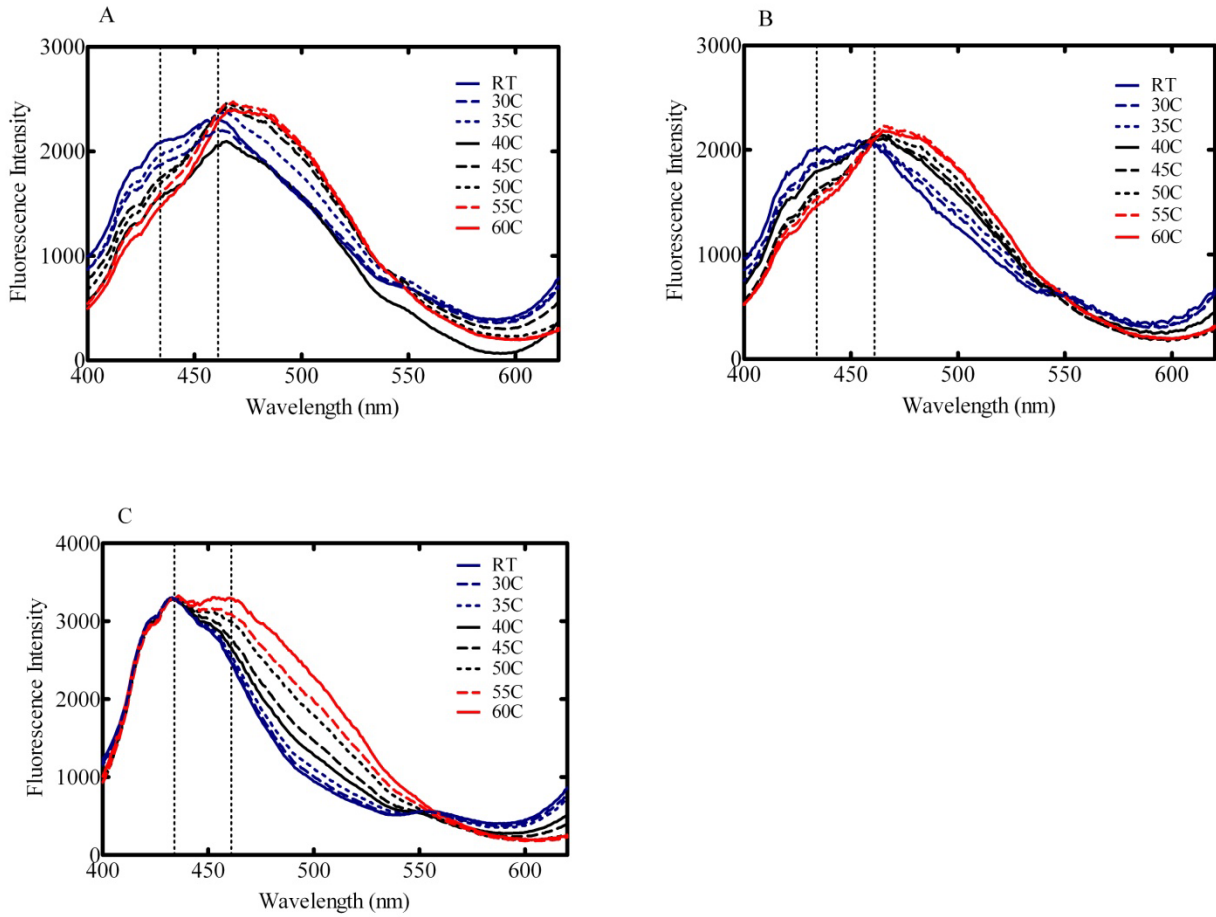

**Supplemental Figure 1. Laurdan emission spectra as a function of temperature in model systems.** Laurdan emission scans (400 nm- 620 nm) were monitored at 350 nm excitation as a function of temperature. The effect of temperature increase on the Laurdan emission spectra is illustrated for Model system 1 (A), Model system 2 (B), and Model system 4 (C). Emission scans are representative of 4 independent experiments.
